# Supplementary material
Source: PubMed Central journal article supplement (PMC6276011)
Supplement: 11658_2012_38_MOESM1_ESM.pdf [file 11658_2012_38_MOESM1_ESM.pdf]

Supplementary material

**microRNAs: FINE TUNING OF ERYTHROPOIESIS**

MARCIN A. LISTOWSKI<sup>1,§</sup>, ELŻBIETA HEGER<sup>1,§</sup>, DŹAMILA  
M. BOGUSŁAWSKA<sup>1</sup>, BEATA MACHNICKA<sup>1</sup>, KAZIMIERZ  
KULICZKOWSKI<sup>2</sup>, JACEK LELUK<sup>1</sup> and ALEKSANDER F. SIKORSKI<sup>1,3,\*</sup>

<sup>1</sup>Department of Molecular Biology, University of Zielona Góra, Poland,

<sup>2</sup>Department of Hematology, Medical University of Wrocław, Poland,

<sup>3</sup>Laboratory of Cytobiochemistry, Faculty of Biotechnology, University  
of Wrocław, Poland

Table S1. List of known genes that code miRNA hairpin precursors and have been detected in the human erythroid line. Information is also included about mature miRNA products and identical or analogous mature sequences (products of different stem-loop sequences, coded by separate genes) that regulate or are likely to be active in erythropoiesis. In addition, the table contains information about other clustered (< 10 kb) miRNA genes.

| Chromosome | Gene symbol*;<br>HGNC ID**    | Gene transcript(s)*                     |                                    | Identical/ analogous<br>to stem-loop product<br>(coding gene<br>localization) | Clustered genes coding stem-loop<br>sequences, precursor of<br>miRNAs* | References            |
|------------|-------------------------------|-----------------------------------------|------------------------------------|-------------------------------------------------------------------------------|------------------------------------------------------------------------|-----------------------|
|            |                               | Stem-loop sequence;<br>accession number | Mature sequence of<br>miRNA        |                                                                               |                                                                        |                       |
| 1          | <i>MIR197</i><br>HGNC:31569   | hsa-mir-197<br>MI0000239                | hsa-miR-197-5p<br>hsa-miR-197-3p   | -                                                                             | -                                                                      | [1, 2]                |
|            | <i>MIR200A</i><br>HGNC:31578  | hsa-mir-200a<br>MI0000737               | hsa-miR-200a-5p<br>hsa-miR-200a-3p | -                                                                             | <i>MIR200B; MIR200A; MIR429</i>                                        | [1]                   |
|            | <i>MIR194-1</i><br>HGNC:31564 | hsa-mir-194-1<br>MI0000488              | hsa-miR-194-5p<br>hsa-miR-194-3p   | hsa-mir-194-2<br>(chromosome 11)                                              | <i>MIR194-1; MIR215</i>                                                | [1, 2]                |
|            | <i>MIR135B</i><br>HGNC:31760  | hsa-mir-135b<br>MI0000810               | hsa-miR-135b-5p<br>hsa-miR-135b-3p | -                                                                             | -                                                                      | [1, 3]                |
|            | <i>MIR137</i><br>HGNC:31523   | hsa-mir-137<br>MI0000454                | hsa-miR-137                        | -                                                                             | <i>MIR137; MIR2682</i>                                                 | [1, 2]                |
|            | <i>MIR34A</i><br>HGNC:31635   | hsa-mir-34a<br>MI0000268                | hsa-miR-34a-5p<br>hsa-miR-34a-3p   | -                                                                             | -                                                                      | [1, 3, 4]             |
|            | <i>MIR29C</i><br>HGNC:31621   | hsa-mir-29c<br>MI0000735                | hsa-miR-29c-5p<br>hsa-miR-29c-3p   | -                                                                             | <i>MIR29B2; MIR29C</i>                                                 | [3, 5]                |
|            | <i>MIR101-1</i><br>HGNC:31488 | hsa-mir-101-1<br>MI0000103              | hsa-miR-101-5p<br>hsa-miR-101-3p   | hsa-mir-101-2<br>(chromosome 9)                                               | <i>MIR101-1; MIR3671</i>                                               | [1]                   |
|            | <i>MIR30C1</i><br>HGNC:31626  | hsa-mir-30c-1<br>MI0000736              | hsa-miR-30c-5p<br>hsa-miR-30c-1-3p | hsa-mir-30c-2<br>(chromosome 6)                                               | <i>MIR30C1; MIR30E</i>                                                 | [1, 2]                |
|            | <i>MIR9-1</i><br>HGNC:31641   | hsa-mir-9-1<br>MI0000466                | hsa-miR-9-5p<br>hsa-miR-9-3p       | hsa-mir-9-2<br>(chromosome 5)<br>hsa-mir-9-3<br>(chromosome 15)               | -                                                                      | [2]                   |
|            | <i>MIR199A2</i><br>HGNC:31572 | hsa-mir-199a-2<br>MI0000281             | hsa-miR-199a-5p<br>hsa-miR-199a-3p | hsa-mir-199a-1<br>(chromosome 19)                                             | <i>MIR199A2; MIR3120; MIR214</i>                                       | based on<br>analogies |

| Chromosome | Gene symbol*;<br>HGNC ID**    | Gene transcript(s)*                     |                                    | Identical/ analogous<br>to stem-loop product<br>(coding gene<br>localization) | Clustered genes coding stem-loop<br>sequences, precursor of<br>miRNAs* | References                                            |        |
|------------|-------------------------------|-----------------------------------------|------------------------------------|-------------------------------------------------------------------------------|------------------------------------------------------------------------|-------------------------------------------------------|--------|
|            |                               | Stem-loop sequence;<br>accession number | Mature sequence of<br>miRNA        |                                                                               |                                                                        |                                                       |        |
| 2          | <i>MIR216A</i><br>HGNC:31593  | hsa-mir-216a<br>MI0000292               | hsa-miR-216a                       | -                                                                             | <i>MIR216A; MIR217</i>                                                 | [1, 3]                                                |        |
|            | <i>MIR128-1</i><br>HGNC:31510 | hsa-mir-128-1<br>MI0000447              | hsa-miR-128                        | hsa-mir-128-2<br>(chromosome 3)                                               | -                                                                      | [2]                                                   |        |
|            | <i>MIR10B</i><br>HGNC:31498   | hsa-mir-10b<br>MI0000267                | hsa-miR-10b-5p<br>hsa-miR-10b-3p   | -                                                                             | -                                                                      | [1]                                                   |        |
|            | <i>MIR26B</i><br>HGNC:31612   | hsa-mir-26b<br>MI0000084                | hsa-miR-26b-5p<br>hsa-miR-26b-3p   | -                                                                             | -                                                                      | [1, 2, 5, 6]                                          |        |
|            | <i>MIR149</i><br>HGNC:31536   | hsa-mir-149<br>MI0000478                | hsa-miR-149-5p<br>hsa-miR-149-3p   | -                                                                             | -                                                                      | [2]                                                   |        |
| 3          | <i>MIR16-2</i><br>HGNC:31546  | hsa-mir-16-2<br>MI0000115               | hsa-miR-16-5p<br>hsa-miR-16-2-3p   | hsa-mir-16-1<br>(chromosome 13)<br>-                                          | <i>MIR15B; MIR16-2</i>                                                 | based on<br>analogies                                 |        |
|            | <i>MIR15B</i><br>HGNC:31544   | hsa-mir-15b<br>MI0000438                | hsa-miR-15b-5p<br>hsa-miR-15b-3p   | -                                                                             | -                                                                      | [1, 2, 5]                                             |        |
|            | <i>MIR128-2</i><br>HGNC:31511 | hsa-mir-128-2<br>MI0000727              | hsa-miR-128                        | hsa-mir-128-1<br>(chromosome 2)                                               | -                                                                      | [1, 3]                                                |        |
|            | <i>MIRLET7G</i><br>HGNC:31485 | hsa-let-7g<br>MI0000433                 | hsa-let-7g-5p<br>hsa-let-7g-3p     | -                                                                             | -                                                                      | [1]                                                   |        |
|            | <i>MIR198</i><br>HGNC:31570   | hsa-mir-198<br>MI0000240                | hsa-miR-198                        | -                                                                             | -                                                                      | [1]                                                   |        |
|            | <i>MIR135A1</i><br>HGNC:31520 | hsa-mir-135a-1<br>MI0000452             | hsa-miR-135a-5p<br>hsa-miR-135a-3p | hsa-mir-135a-2<br>(chromosome 12)                                             | -                                                                      | [1]                                                   |        |
|            | <i>MIR138-1</i><br>HGNC:31524 | hsa-mir-138-1<br>MI0000476              | hsa-miR-138-5p<br>hsa-miR-138-1-3p | hsa-mir-138-2<br>(chromosome 16)<br>-                                         | -                                                                      | [1]                                                   |        |
|            | <i>MIR28</i><br>HGNC:31615    | hsa-mir-28<br>MI0000086                 | hsa-miR-28-5p<br>hsa-miR-28-3p     | -                                                                             | -                                                                      | [2]                                                   |        |
|            | <i>MIR191</i><br>HGNC:31561   | hsa-mir-191<br>MI0000465                | hsa-miR-191-5p<br>hsa-miR-191-3p   | -                                                                             | <i>MIR191; MIR425</i>                                                  | [5, 6]                                                |        |
|            | 4                             | <i>MIR218-1</i><br>HGNC:31595           | hsa-mir-218-1<br>MI0000294         | hsa-miR-218-5p<br>hsa-miR-218-1-3p                                            | hsa-mir-218-2<br>(chromosome 5)<br>-                                   | -                                                     | [1, 3] |
|            |                               | <i>MIR302B</i><br>HGNC:31763            | hsa-mir-302b<br>MI0000772          | hsa-miR-302b-5p<br>hsa-miR-302b-3p                                            | -                                                                      | -                                                     | [1]    |
|            |                               | <i>MIR302A</i><br>HGNC:31623            | hsa-mir-302a<br>MI0000738          | hsa-miR-302a-5p                                                               | -                                                                      | <i>MIR302B; MIR302C; MIR302D;<br/>MIR302A; MIR367</i> | [1]    |
|            |                               | <i>MIR95</i><br>HGNC:31647              | hsa-mir-95<br>MI0000097            | hsa-miR-95                                                                    | -                                                                      | -                                                     | [1]    |
| 5          | <i>MIR146A</i><br>HGNC:31533  | hsa-mir-146a<br>MI0000477               | hsa-miR-146a-5p<br>hsa-miR-146a-3p | -                                                                             | -                                                                      | [1, 2, 4, 7]                                          |        |
|            | <i>MIR145</i><br>HGNC:31532   | hsa-mir-145<br>MI0000461                | hsa-miR-145-5p<br>hsa-miR-145-3p   | -                                                                             | <i>MIR143; MIR145</i>                                                  | [1, 4]                                                |        |
|            | <i>MIR143</i><br>HGNC:31530   | hsa-mir-143<br>MI0000459                | hsa-miR-143-5p<br>hsa-miR-143-3p   | -                                                                             | -                                                                      | [1, 4]                                                |        |
|            | <i>MIR9-2</i><br>HGNC:31642   | hsa-mir-9-2<br>MI0000467                | hsa-miR-9-5p<br>hsa-miR-9-3p       | hsa-mir-9-1<br>(chromosome 1)<br>hsa-mir-9-3<br>(chromosome 15)               | -                                                                      | based on<br>analogies                                 |        |
|            | <i>MIR103A1</i><br>HGNC:31490 | hsa-mir-103a-1<br>MI0000109             | hsa-miR-103a-3p                    | hsa-mir-103a-2<br>(chromosome 20)                                             | <i>MIR103B1; MIR103A1</i>                                              | [1, 2]                                                |        |
|            | <i>MIR218-2</i><br>HGNC:31596 | hsa-mir-218-2<br>(MI0000295)            | hsa-miR-218-5p<br>hsa-miR-218-2-3p | hsa-mir-218-1<br>(chromosome 4)<br>-                                          | -                                                                      | [1]                                                   |        |
|            | <i>MIR340</i><br>HGNC:31777   | hsa-mir-340<br>MI0000802                | hsa-miR-340-5p<br>hsa-miR-340-3p   | -                                                                             | -                                                                      | [1]                                                   |        |
|            | <i>MIR378A</i><br>HGNC:31871  | hsa-mir-378a<br>MI0000786               | hsa-miR-378a-5p<br>hsa-miR-378a-3p | -                                                                             | -                                                                      | [8]                                                   |        |
| 6          | <i>MIR30C2</i><br>HGNC:31627  | hsa-mir-30c-2<br>MI0000254              | hsa-miR-30c-5p<br>hsa-miR-30c-2-3p | hsa-mir-30c-1<br>(chromosome 1)                                               | -                                                                      | based on<br>analogies                                 |        |

| Chromosome | Gene symbol*;<br>HGNC ID**     | Gene transcript(s)*                     |                                      | Identical/ analogous<br>to stem-loop product<br>(coding gene<br>localization) | Clustered genes coding stem-loop<br>sequences, precursor of<br>miRNAs* | References                                  |               |
|------------|--------------------------------|-----------------------------------------|--------------------------------------|-------------------------------------------------------------------------------|------------------------------------------------------------------------|---------------------------------------------|---------------|
|            |                                | Stem-loop sequence;<br>accession number | Mature sequence of<br>miRNA          |                                                                               |                                                                        |                                             |               |
| 7          | <i>MIR96</i><br>HGNC:31648     | hsa-mir-96<br>MI0000098                 | hsa-miR-96-5p<br>hsa-miR-96-3p       | -                                                                             | <i>MIR183; MIR96; MIR182</i>                                           | [3, 9]                                      |               |
|            | <i>MIR129-1</i><br>HGNC:31512  | hsa-mir-129-1<br>MI0000252              | hsa-miR-129-5p<br>hsa-miR-129-1-3p   | hsa-mir-129-2<br>(chromosome 11)                                              | -                                                                      | [1]                                         |               |
|            | <i>MIR339</i><br>HGNC:31776    | hsa-mir-339<br>MI0000815                | hsa-miR-339-5p<br>hsa-miR-339-3p     | -                                                                             | -                                                                      | [1]                                         |               |
|            | <i>MIR196B</i><br>HGNC:31790   | hsa-mir-196b<br>MI0001150               | hsa-miR-196b-5p                      | -                                                                             | -                                                                      | [1]                                         |               |
|            | <i>MIR93</i><br>HGNC:31645     | hsa-mir-93<br>MI0000095                 | hsa-miR-93-5p<br>hsa-miR-93-3p       | -                                                                             | <i>MIR106B; MIR93; MIR25</i>                                           | [1, 2]                                      |               |
|            | <i>MIR25</i><br>HGNC:31609     | hsa-mir-25<br>MI0000082                 | hsa-miR-25-5p<br>hsa-miR-25-3p       | -                                                                             | -                                                                      | [1, 6]                                      |               |
|            | <i>MIR29A</i><br>HGNC:31616    | hsa-mir-29a<br>MI0000087                | hsa-miR-29a-5p<br>hsa-miR-29a-3p     | -                                                                             | <i>MIR29B2; MIR29A</i>                                                 | [1, 3, 5]                                   |               |
|            | <i>MIR148A</i><br>HGNC:31535   | hsa-mir-148a<br>MI0000253               | hsa-miR-148a-5p<br>hsa-miR-148a-3p   | -                                                                             | -                                                                      | [3]                                         |               |
|            | 8                              | <i>MIR151</i><br>HGNC:31762             | hsa-mir-151a<br>MI0000809            | hsa-miR-151a-5p<br>hsa-miR-151a-3p                                            | -                                                                      | -                                           | [1]           |
|            |                                | <i>MIR320A</i><br>HGNC:31632            | hsa-mir-320a<br>MI0000542            | hsa-miR-320a                                                                  | -                                                                      | -                                           | [2]           |
| 9          |                                | <i>MIR24-1</i><br>HGNC:31607            | hsa-mir-24-1<br>MI0000080            | hsa-mir-24-1-5p<br><br>hsa-mir-24-3p                                          | -<br><br>hsa-mir-24-2<br>(chromosome 19)                               | <i>MIR23B; MIR27B; MIR3074;<br/>MIR24-1</i> | [1, 2, 6, 10] |
|            | <i>MIR23B</i><br>HGNC:31606    | hsa-mir-23b<br>MI0000439                | hsa-miR-23b-5p<br>hsa-miR-23b-3p     | -                                                                             | -                                                                      | [1, 2]                                      |               |
|            | <i>MIR126</i><br>HGNC:31508    | hsa-mir-126<br>MI0000471                | hsa-miR-126-5p<br>hsa-miR-126-3p     | -                                                                             | -                                                                      | [2, 11]                                     |               |
|            | <i>MIRLET7A1</i><br>HGNC:31476 | hsa-let-7a<br>MI0000060                 | hsa-let-7a-5p<br><br>hsa-let-7a-3p   | hsa-let-7a-2<br>(chromosome 11)<br>hsa-let-7a-3<br>(chromosome 22)<br><br>-   | <i>MIRLET7A1; MIRLET7F1;<br/>MIRLET7D</i>                              | [1]                                         |               |
|            | <i>MIRLET7F1</i><br>HGNC:31483 | hsa-let-7f-1<br>MI0000067               | hsa-let-7f-5p<br><br>hsa-let-7f-1-3p | -<br><br>hsa-let-7f-2<br>(chromosome X)                                       | -                                                                      | [1]                                         |               |
|            | <i>MIRLET7D</i><br>HGNC:31481  | let-7d<br>MI0000065                     | hsa-let-7d-5p<br>hsa-let-7d-3p       | -                                                                             | -                                                                      | [1]                                         |               |
|            | <i>MIR147</i><br>HGNC:31534    | hsa-mir-147a<br>MI0000262               | hsa-miR-147a                         | -                                                                             | -                                                                      | [1]                                         |               |
|            | <i>MIR204</i><br>HGNC:31582    | hsa-mir-204<br>MI0000284                | hsa-miR-204-5p<br>hsa-miR-204-3p     | -                                                                             | -                                                                      | [1, 3, 5]                                   |               |
|            | <i>MIR101-2</i><br>HGNC:31489  | hsa-mir-101-2<br>MI0000739              | hsa-miR-101-3p                       | hsa-mir-101-1<br>(chromosome 1)                                               | -                                                                      | based on<br>analogies                       |               |
|            | 10                             | <i>MIR107</i><br>HGNC:31496             | hsa-mir-107<br>MI0000114             | hsa-miR-107                                                                   | -                                                                      | -                                           | [1, 2, 6]     |
| 11         | <i>MIR129-2</i><br>HGNC:31513  | hsa-mir-129-2<br>MI0000473              | hsa-miR-129-5p<br>hsa-miR-129-2-3p   | hsa-mir-129-1<br>(chromosome 7)                                               | -                                                                      | based on<br>analogies                       |               |
|            | <i>MIR194-2</i><br>HGNC:31565  | hsa-mir-194-2<br>MI0000732              | hsa-miR-194-5p<br>hsa-miR-194-3p     | hsa-mir-194-1<br>(chromosome 1)                                               | <i>MIR194-2; MIR192</i>                                                | based on<br>analogies                       |               |
|            | <i>MIR125B1</i><br>HGNC:31506  | hsa-mir-125b-1<br>MI0000446             | hsa-miR-125b-5p<br>hsa-miR-125b-1-3p | hsa-mir-125b-2<br>(chromosome 21)                                             | -                                                                      | [1]                                         |               |
|            | <i>MIR139</i><br>HGNC:31526    | hsa-mir-139<br>MI0000261                | hsa-miR-139-5p<br>hsa-miR-139-3p     | -                                                                             | -                                                                      | [1, 3]                                      |               |
|            | <i>MIR210</i><br>HGNC:31587    | hsa-mir-210<br>MI0000286                | hsa-miR-210                          | -                                                                             | -                                                                      | [1-3, 12]                                   |               |
|            | <i>MIRLET7A2</i><br>HGNC:31477 | hsa-let-7a-2<br>MI0000061               | hsa-let-7a-2-5p<br><br>hsa-let-7a-3p | hsa-let-7a<br>(chromosome 9)<br>hsa-let-7a-3<br>(chromosome 22)<br><br>-      | <i>MIR100; MIRLET7A2</i>                                               | based on<br>analogies                       |               |

| Chromosome                  | Gene symbol*;<br>HGNC ID**    | Gene transcript(s)*                     |                                        | Identical/ analogous<br>to stem-loop product<br>(coding gene<br>localization) | Clustered genes coding stem-loop<br>sequences, precursor of<br>miRNAs*                                                               | References            |     |
|-----------------------------|-------------------------------|-----------------------------------------|----------------------------------------|-------------------------------------------------------------------------------|--------------------------------------------------------------------------------------------------------------------------------------|-----------------------|-----|
|                             |                               | Stem-loop sequence;<br>accession number | Mature sequence of<br>miRNA            |                                                                               |                                                                                                                                      |                       |     |
| 12                          | <i>MIRLET71</i><br>HGNC:31486 | hsa-let-7i<br>MI0000434                 | hsa-let-7i-5p<br>hsa-let-7i-3p         | -                                                                             | -                                                                                                                                    | [1, 2]                |     |
|                             | <i>MIR331</i><br>HGNC:31772   | hsa-mir-331<br>MI0000812                | hsa-miR-331-5p<br>hsa-miR-331-3p       | -                                                                             | -                                                                                                                                    | [2, 3]                |     |
|                             | <i>MIR196A2</i><br>HGNC:31568 | hsa-mir-196a-2<br>MI0000279             | hsa-miR-196a-5p<br>hsa-miR-196a-3p     | hsa-mir-196a-1<br>(chromosome 17)                                             | -                                                                                                                                    | based on<br>analogies |     |
|                             | <i>MIR135A2</i><br>HGNC:31521 | hsa-mir-135a-2<br>MI0000453             | hsa-miR-135a-5p                        | hsa-mir-135a-1<br>(chromosome 3)                                              | -                                                                                                                                    | based on<br>analogies |     |
| 13                          | <i>MIR16-1</i><br>HGNC:31545  | hsa-mir-16-1<br>MI0000070               | hsa-miR-16-5p<br><br>hsa-miR-16-1-3p   | hsa-mir-16-2<br>(chromosome 3)                                                | <i>MIR15A; MIR16-1</i>                                                                                                               | [1, 2]                |     |
|                             | <i>MIR15A</i><br>HGNC:31543   | hsa-mir-15a<br>MI0000069                | hsa-miR-15a-5p<br>hsa-miR-15a-3p       | -                                                                             | -                                                                                                                                    | [1, 2, 5, 13]         |     |
|                             | <i>MIR19B1</i><br>HGNC:31575  | hsa-mir-19b<br>MI0000074                | hsa-miR-19b-1-5p<br><br>hsa-miR-19b-3p | -<br><br>hsa-mir-19b-2<br>(chromosome X)                                      | <i>MIR17; MIR18A; MIR19A;<br/>MIR20A; MIR19B1; MIR92A1</i>                                                                           | [1, 2]<br>[1, 2]      |     |
|                             | <i>MIR19A</i><br>HGNC:31574   | hsa-mir-19a<br>MI0000073                | hsa-miR-19a-5p<br>hsa-miR-19a-3p       | -                                                                             | -                                                                                                                                    | [1, 2]                |     |
|                             | <i>MIR92A1</i><br>HGNC:31643  | hsa-mir-92a-1<br>MI0000093              | hsa-miR-92a-1-5p<br><br>hsa-miR-92a-3p | -<br><br>hsa-mir-92a-2<br>(chromosome X)                                      | -                                                                                                                                    | [2]                   |     |
|                             | <i>MIR370</i><br>HGNC:31784   | hsa-mir-370<br>MI0000778                | hsa-miR-370                            | -                                                                             | -                                                                                                                                    | [1]                   |     |
| 14                          | <i>MIR345</i><br>HGNC:31779   | hsa-mir-345<br>MI0000825                | hsa-miR-345-5p<br>hsa-miR-345-3p       | -                                                                             | -                                                                                                                                    | [1]                   |     |
|                             | <i>MIR337</i><br>HGNC:31774   | hsa-mir-337<br>MI0000806                | hsa-miR-337-5p<br>hsa-miR-337-3p       | -                                                                             | <i>MIR493; MIR337; MIR665;<br/>MIR431; MIR433; MIR127;<br/>MIR432</i>                                                                | [1]<br>[2]            |     |
|                             | <i>MIR127</i><br>HGNC:31509   | hsa-mir-127<br>MI0000472                | hsa-miR-127-5p<br>hsa-miR-127-3p       | -                                                                             | -                                                                                                                                    | [2]                   |     |
|                             | <i>MIR342</i><br>HGNC:31778   | hsa-mir-342<br>MI0000805                | hsa-miR-342-5p<br>hsa-miR-342-3p       | -                                                                             | <i>MIR151B; MIR342</i>                                                                                                               | [1, 2]                |     |
|                             | <i>MIR136</i><br>HGNC:31522   | hsa-mir-136<br>MI0000475                | hsa-miR-136-5p<br>hsa-miR-136-3p       | -                                                                             | <i>MIR665; MIR431; MIR433;<br/>MIR127; MIR432; MIR136</i>                                                                            | [2]                   |     |
|                             | <i>MIR381</i><br>HGNC:31874   | hsa-mir-381<br>MI0000789                | hsa-miR-381                            | -                                                                             | <i>MIR381; MIR487B; MIR539;<br/>MIR889; MIR544A; MIR655;</i>                                                                         | [3, 5]                |     |
|                             | <i>MIR382</i><br>HGNC:31875   | hsa-mir-382<br>MI0000790                | hsa-miR-382-5p<br>hsa-miR-382-3p       | -                                                                             | <i>MIR487A; MIR382; MIR134;<br/>MIR668; MIR485; MIR323B;</i>                                                                         | [5]                   |     |
|                             | <i>MIR154</i><br>HGNC:31541   | hsa-mir-154<br>MI0000480                | hsa-miR-154-5p<br>hsa-miR-154-3p       | -                                                                             | <i>MIR154; MIR496; MIR377</i>                                                                                                        | [2]                   |     |
|                             | <i>MIR299</i><br>HGNC:31618   | hsa-mir-299<br>MI0000744                | hsa-miR-299-5p<br>hsa-miR-299-3p       | -                                                                             | <i>MIR379; MIR411; MIR299;<br/>MIR380; MIR1197; MIR323A;<br/>MIR758; MIR329-1; MIR329-2;<br/>MIR494; MIR1193; MIR543;<br/>MIR495</i> | [2]                   |     |
|                             | <i>MIR376A2</i><br>HGNC:32532 | hsa-mir-376a-2<br>MI0003529             | hsa-miR-376a-3p                        | hsa-mir-376a-1<br>(chromosome 14)                                             | <i>MIR543; MIR495; MIR376C;<br/>MIR376A2; MIR376B;</i>                                                                               | based on<br>analogies |     |
|                             | <i>MIR376A1</i><br>HGNC:31869 | hsa-mir-376a-1<br>MI0000784             | hsa-miR-376a-3p<br><br>hsa-miR-376a-5p | hsa-mir-376a-2<br>(chromosome 14)                                             | <i>MIR376A1; MIR300; MIR1185-1;<br/>MIR1185-2; MIR381; MIR487B;<br/>MIR539; MIR889; MIR544A;<br/>MIR655</i>                          | [14]                  |     |
|                             | 15                            | <i>MIR184</i><br>HGNC:31555             | hsa-mir-184<br>MI0000481               | hsa-miR-184                                                                   | -                                                                                                                                    | -                     | [1] |
|                             |                               | <i>MIR211</i><br>HGNC:31588             | hsa-mir-211<br>MI0000287               | hsa-miR-211-5p<br>hsa-miR-211-3p                                              | -                                                                                                                                    | -                     | [1] |
| <i>MIR9-3</i><br>HGNC:31646 |                               | hsa-mir-9-3<br>MI0000468                | hsa-miR-9-5p<br>hsa-miR-9-3p           | hsa-mir-9-1<br>(chromosome 1)<br>hsa-mir-9-2<br>(chromosome 5)                | -                                                                                                                                    | based on<br>analogies |     |

| Chromosome                    | Gene symbol*;<br>HGNC ID**    | Gene transcript(s)*                     |                                    | Identical/ analogous<br>to stem-loop product<br>(coding gene<br>localization) | Clustered genes coding stem-loop<br>sequences, precursor of<br>miRNAs* | References             |            |
|-------------------------------|-------------------------------|-----------------------------------------|------------------------------------|-------------------------------------------------------------------------------|------------------------------------------------------------------------|------------------------|------------|
|                               |                               | Stem-loop sequence;<br>accession number | Mature sequence of<br>miRNA        |                                                                               |                                                                        |                        |            |
| 16                            | <i>MIR140</i><br>HGNC:31527   | hsa-mir-140<br>MI0000456                | hsa-miR-140-5p<br>hsa-miR-140-3p   | -                                                                             | -                                                                      | [5]                    |            |
|                               | <i>MIR138-2</i><br>HGNC:31525 | hsa-mir-138-2<br>MI0000455              | hsa-miR-138-5p                     | hsa-mir-138-1<br>(chromosome 3)                                               | -                                                                      | based on<br>analogies  |            |
|                               |                               |                                         | hsa-miR-138-2-3p                   | -                                                                             |                                                                        |                        |            |
| 17                            | <i>MIR451</i><br>HGNC:32053   | hsa-mir-451<br>MI0001729                | hsa-miR-451a                       | -                                                                             | <i>MIR451A; MIR451B; MIR144;</i><br><i>MIR4732</i>                     | [5, 15-17]             |            |
|                               | <i>MIR144</i><br>HGNC:31531   | hsa-mir-144<br>MI0000460                | hsa-miR-144-5p<br>hsa-miR-144-3p   | -                                                                             | -                                                                      | [5, 16, 18, 19]        |            |
|                               | <i>MIR193A</i><br>HGNC:31563  | hsa-mir-193a<br>MI0000487               | hsa-miR-193a-5p<br>hsa-miR-193a-3p | -                                                                             | -                                                                      | [1, 5]                 |            |
|                               | <i>MIR338</i><br>HGNC:31775   | hsa-mir-338<br>MI0000814                | hsa-miR-338-5p<br>hsa-miR-338-3p   | -                                                                             | <i>MIR1250; MIR338; MIR3065;</i><br><i>MIR657</i>                      | [1]                    |            |
|                               | <i>MIR196A1</i><br>HGNC:31567 | hsa-mir-196a-1<br>MI0000238             | hsa-miR-196a-5p                    | hsa-mir-196a-2<br>(chromosome 12)                                             | -                                                                      | [1]                    |            |
|                               | <i>MIR324</i><br>HGNC:31767   | hsa-mir-324<br>MI0000813                | hsa-miR-324-5p<br>hsa-miR-324-3p   | -                                                                             | -                                                                      | [1, 3, 4]              |            |
|                               | <i>MIR195</i><br>HGNC:31566   | hsa-mir-195<br>MI0000489                | hsa-miR-195-5p<br>hsa-mir-195-3p   | -                                                                             | <i>MIR497; MIR195</i>                                                  | [1, 3]                 |            |
|                               | <i>MIR21</i><br>HGNC:31586    | hsa-mir-21<br>MI0000077                 | hsa-miR-21-5p<br>hsa-mir-21-3p     | -                                                                             | -                                                                      | [2]                    |            |
|                               | <i>MIR22</i><br>HGNC:31599    | hsa-mir-22<br>MI0000078                 | hsa-miR-22-5p<br>hsa-mir-22-3p     | -                                                                             | -                                                                      | [2, 5]                 |            |
|                               | <i>MIR152</i><br>HGNC:31538   | hsa-mir-152<br>MI0000462                | hsa-miR-152                        | -                                                                             | -                                                                      | [2]                    |            |
|                               | <i>MIR142</i><br>HGNC:31529   | hsa-mir-142<br>MI0000458                | hsa-miR-142-5p<br>hsa-miR-142-3p   | -                                                                             | <i>MIR4736; MIR142</i>                                                 | [1, 3, 5]              |            |
|                               | 18                            | <i>MIR122</i><br>HGNC:31501             | hsa-mir-122a<br>MI0000442          | hsa-miR-122-5p<br>hsa-miR-122-3p                                              | -                                                                      | <i>MIR122; MIR3591</i> | [1]        |
|                               |                               | <i>MIR187</i><br>HGNC:31558             | hsa-mir-187<br>MI0000274           | hsa-miR-187-3p<br>hsa-miR-187-5p                                              | -                                                                      | -                      | [1, 2]     |
|                               |                               |                                         |                                    |                                                                               |                                                                        |                        |            |
|                               | 19                            | <i>MIR150</i><br>HGNC:31537             | hsa-mir-150<br>MI0000479           | hsa-miR-150-5p<br>hsa-miR-150-3p                                              | -                                                                      | -                      | [2, 3, 20] |
| <i>MIRLET7E</i><br>HGNC:31482 |                               | hsa-let-7e<br>MI0000066                 | hsa-let-7e-5p<br>hsa-let-7e-3p     | -                                                                             | <i>MIR99B; MIRLET7E; MIR125A</i>                                       | [1, 2]                 |            |
| <i>MIR125A</i><br>HGNC:31505  |                               | hsa-mir-125a<br>MI0000469               | hsa-miR-125a-5p<br>hsa-miR-125a-3p | -                                                                             | -                                                                      | [1]                    |            |
| <i>MIR99B</i><br>HGNC:31651   |                               | hsa-mir-99b<br>MI0000746                | hsa-miR-99b-5p<br>hsa-miR-99b-3p   | -                                                                             | -                                                                      | [1]                    |            |
| <i>MIR373</i><br>HGNC:31787   |                               | hsa-mir-373<br>MI0000781                | hsa-miR-373-5p<br>hsa-miR-373-3p   | -                                                                             | <i>MIR371A; MIR371B; MIR372;</i><br><i>MIR373</i>                      | [1]                    |            |
| <i>MIR330</i><br>HGNC:31771   |                               | hsa-mir-330<br>MI0000803                | hsa-miR-330-3p<br>hsa-miR-330-5p   | -                                                                             | -                                                                      | [1]                    |            |
| <i>MIR199A1</i><br>HGNC:31571 |                               | hsa-mir-199a-1<br>MI0000242             | hsa-miR-199a-5p<br>hsa-miR-199a-3p | hsa-mir-199a-2<br>(chromosome 1)                                              | -                                                                      | [1, 4]                 |            |
| <i>MIR24-2</i><br>HGNC:31608  |                               | hsa-mir-24-2<br>MI0000081               | hsa-miR-24-2-5p                    | hsa-mir-24-2<br>(chromosome 9)                                                | <i>MIR23A; MIR27A; MIR24-2</i>                                         | based on<br>analogies  |            |
|                               |                               |                                         | hsa-mir-24-3p                      | -                                                                             |                                                                        |                        |            |
| <i>MIR27A</i><br>HGNC:31613   |                               | hsa-mir-27a<br>MI0000085                | hsa-miR-27a-5p<br>hsa-miR-27a-3p   | -                                                                             | -                                                                      | [1, 2]                 |            |
| <i>MIR181C</i><br>HGNC:31552  |                               | hsa-mir-181c<br>MI0000271               | hsa-miR-181c-5p<br>hsa-miR-181c-3p | -                                                                             | <i>MIR181C; MIR181D; MIR24-2;</i><br><i>MIR27A; MIR23A</i>             | [2, 3]                 |            |
| 20                            | <i>MIR298</i><br>HGNC:33634   | hsa-mir-298<br>MI0005523                | hsa-miR-298                        | -                                                                             | <i>MIR298; MIR296</i>                                                  | [3, 5]                 |            |
|                               | <i>MIR103A2</i><br>HGNC:31491 | hsa-mir-103a-2<br>MI0000108             | hsa-miR-103a-2-5p                  | -                                                                             | -                                                                      | based on<br>analogies  |            |
|                               |                               |                                         | hsa-miR-103a-3p                    | hsa-mir-103a-1<br>(chromosome 5)                                              |                                                                        |                        |            |
|                               | <i>MIR296</i><br>HGNC:31617   | hsa-mir-296<br>MI0000747                | hsa-miR-296-5p<br>hsa-miR-296-3p   | -                                                                             | -                                                                      | [5]                    |            |

| Chromosome | Gene symbol*;<br>HGNC ID**     | Gene transcript(s)*                     |                                                 | Identical/ analogous<br>to stem-loop product<br>(coding gene<br>localization) | Clustered genes coding stem-loop<br>sequences, precursor of<br>miRNAs*  | References                    |
|------------|--------------------------------|-----------------------------------------|-------------------------------------------------|-------------------------------------------------------------------------------|-------------------------------------------------------------------------|-------------------------------|
|            |                                | Stem-loop sequence;<br>accession number | Mature sequence of<br>miRNA                     |                                                                               |                                                                         |                               |
| 21         | <i>MIR125B2</i><br>HGNC:31507  | hsa-mir-125b-2<br>MI0000470             | hsa-miR-125b-5p<br>hsa-miR-125b-2-3p            | hsa-mir-125b-1<br>(chromosome 11)                                             | -                                                                       | based on<br>analogies<br>[21] |
|            | <i>MIR155</i><br>HGNC:31542    | hsa-mir-155<br>MI0000681                | hsa-miR-155-5p<br>hsa-miR-155-3p                | -                                                                             | -                                                                       |                               |
|            | <i>MIRLET7C</i><br>HGNC:31480  | hsa-let-7c<br>MI0000064                 | hsa-let-7c                                      | -                                                                             | <i>MIR99A; MIRLET7C</i>                                                 | [1]                           |
| 22         | <i>MIRLET7A3</i><br>HGNC:31478 | hsa-let-7a-3<br>MI0000062               | hsa-let-7a-5p                                   | hsa-let-7a<br>(chromosome 9)<br>hsa-let-7a-2<br>(chromosome 11)               | <i>MIRLET7A3; MIR4763;<br/>MIRLET7B</i>                                 | based on<br>analogies         |
|            | <i>MIRLET7B</i><br>HGNC:31479  | hsa-let-7b<br>MI0000063                 | hsa-let-7a-3p<br>hsa-let-7b-5p<br>hsa-let-7b-3p | -                                                                             | -                                                                       | [6]                           |
|            | <i>MIR185</i><br>HGNC:31556    | hsa-mir-185<br>MI0000482                | hsa-miR-185-5p<br>hsa-miR-185-3p                | -                                                                             | -                                                                       | [1, 2]                        |
| X          | <i>MIR223</i><br>HGNC:31603    | hsa-mir-223<br>MI0000300                | hsa-miR-223-5p<br>hsa-miR-223-3p                | -                                                                             | -                                                                       | [1, 4, 22]                    |
|            | <i>MIR221</i><br>HGNC:31601    | hsa-mir-221<br>MI0000298                | hsa-miR-221-5p<br>hsa-miR-221-3p                | -                                                                             | <i>MIR222; MIR221</i>                                                   | [1-3, 23]                     |
|            | <i>MIR222</i><br>HGNC:31602    | hsa-mir-222<br>MI0000299                | hsa-miR-222-5p<br>hsa-miR-222-3p                | -                                                                             | <i>MIR532; MIR188; MIR500A;<br/>MIR362; MIR501; MIR500B;<br/>MIR660</i> | [1, 2, 6, 23]                 |
|            | <i>MIR188</i><br>HGNC:31559    | hsa-mir-188<br>MI0000484                | hsa-miR-188-5p<br>hsa-miR-188-3p                | -                                                                             | -                                                                       | based on<br>analogies         |
|            | <i>MIR105-1</i><br>HGNC:31492  | hsa-mir-105-1<br>MI0000111              | hsa-miR-105-5p<br>hsa-miR-105-3p                | hsa-mir-105-2<br>(chromosome X)                                               | <i>MIR105-2; MIR767; MIR105-1</i>                                       | [1]                           |
|            | <i>MIR105-2</i><br>HGNC:31493  | hsa-mir-105-2<br>MI0000112              | hsa-miR-105-5p<br>hsa-miR-105-3p                | hsa-mir-105-1<br>(chromosome X)                                               | -                                                                       | based on<br>analogies         |
|            | <i>MIR325</i><br>HGNC:31768    | hsa-mir-325<br>MI0000824                | hsa-miR-325                                     | -                                                                             | -                                                                       | [1]                           |
|            | <i>MIRLET7F2</i><br>HGNC:31484 | hsa-let-7f-2<br>MI0000068               | hsa-let-7f-5p                                   | -                                                                             | <i>MIRLET7F2; MIR98</i>                                                 | based on<br>analogies         |
|            | <i>MIR98</i><br>HGNC:31649     | hsa-mir-98<br>MI0000100                 | hsa-let-7f-2-3p<br>hsa-miR-98                   | hsa-let-7f-1<br>(chromosome 9)                                                | -                                                                       | [1]                           |
|            | <i>MIR106A</i><br>HGNC:31494   | hsa-mir-106a<br>MI0000113               | hsa-miR-106a-5p<br>hsa-miR-106a-3p              | -                                                                             | <i>MIR106A; MIR18B; MIR20B;<br/>MIR19B2; MIR92A2; MIR363</i>            | [1]                           |
|            | <i>MIR362</i><br>HGNC:32022    | hsa-mir-362<br>MI0000762                | hsa-miR-362-5p<br>hsa-miR-362-3p                | -                                                                             | -                                                                       | [12]                          |
|            | <i>MIR19B2</i><br>HGNC:31576   | hsa-mir-19b-2<br>MI0000075              | hsa-mir-19b-2-5p                                | -                                                                             | -                                                                       | based on<br>analogies         |
|            | <i>MIR92A2</i><br>HGNC:31644   | hsa-mir-92a-2<br>MI0000094              | hsa-mir-19b-3p<br>hsa-miR-92a-2-5p              | hsa-mir-19b<br>(chromosome 13)<br>hsa-mir-92a-1<br>(chromosome 13)            | -                                                                       | [2]                           |

\*<http://www.mirbase.org>\*\*<http://www.genenames.org/>

## REFERENCES

- Chen, S.Y., Wang, Y., Telen, M.J. and Chi, J.T. The genomic analysis of erythrocyte microRNA expression in sickle cell diseases. **PLoS One** 3 (2008) e2360.
- Choong, M.L., Yang, H.H. and McNiece, I. MicroRNA expression profiling during human cord blood-derived CD34 cell erythropoiesis. **Exp. Hematol.** 35 (2007) 551-564.
- Zanette, D.L., Rivadavia, F., Molfetta, G.A., Barbuzano, F.G., Proto-Siqueira, R., Silva-Jr, W.A., Falcao, R.P. and Zago, M.A. miRNA expression profiles

- in chronic lymphocytic and acute lymphocytic leukemia. **Braz. J. Med. Biol. Res.** 40 (2007) 1435-1440.
4. Votavova, H., Grmanova, M., Dostalova Merkerova, M., Belickova, M., Vasikova, A., Neuwirtova, R. and Cermak, J. Differential expression of microRNAs in CD34+ cells of 5q- syndrome. **J. Hematol. Oncol.** 4 (2011) 1.
  5. Zhan, M., Miller, C.P., Papayannopoulou, T., Stamatoyannopoulos, G. and Song, C.Z. MicroRNA expression dynamics during murine and human erythroid differentiation. **Exp. Hematol.** 35 (2007) 1015-1025.
  6. Georgantas, R.W., 3rd, Hildreth, R., Morisot, S., Alder, J., Liu, C.G., Heimfeld, S., Calin, G.A., Croce, C.M. and Civin, C.I. CD34+ hematopoietic stem-progenitor cell microRNA expression and function: a circuit diagram of differentiation control. **Proc. Natl. Acad. Sci. USA** 104 (2007) 2750-2755.
  7. Labbaye, C., Spinello, I., Quaranta, M.T., Pelosi, E., Pasquini, L., Petrucci, E., Biffoni, M., Nuzzolo, E.R., Billi, M., Foa, R., Brunetti, E., Grignani, F., Testa, U. and Peschle, C. A three-step pathway comprising PLZF/miR-146a/CXCR4 controls megakaryopoiesis. **Nat. Cell Biol.** 10 (2008) 788-801.
  8. Bruchova, H., Yoon, D., Agarwal, A.M., Mendell, J. and Prchal, J.T. Regulated expression of microRNAs in normal and polycythemia vera erythropoiesis. **Exp. Hematol.** 35 (2007) 1657-1667.
  9. Azzouzi, I., Moest, H., Winkler, J., Fauchere, J.C., Gerber, A.P., Wollscheid, B., Stoffel, M., Schmutz, M. and Speer, O. MicroRNA-96 directly inhibits gamma-globin expression in human erythropoiesis. **PLoS One** 6 (2011) e22838.
  10. Wang, Q., Huang, Z., Xue, H., Jin, C., Ju, X.L., Han, J.D. and Chen, Y.G. MicroRNA miR-24 inhibits erythropoiesis by targeting activin type I receptor ALK4. **Blood** 111 (2008) 588-595.
  11. Grabher, C., Payne, E.M., Johnston, A.B., Bolli, N., Lechman, E., Dick, J.E., Kanki, J.P. and Look, A.T. Zebrafish microRNA-126 determines hematopoietic cell fate through c-Myb. **Leukemia** 25 (2011) 506-514.
  12. Kosaka, N., Sugiura, K., Yamamoto, Y., Yoshioka, Y., Miyazaki, H., Komatsu, N., Ochiya, T. and Kato, T. Identification of erythropoietin-induced microRNAs in haematopoietic cells during erythroid differentiation. **Br. J. Haematol.** 142 (2008) 293-300.
  13. Zhao, H., Kalota, A., Jin, S. and Gewirtz, A.M. The c-myb proto-oncogene and microRNA-15a comprise an active autoregulatory feedback loop in human hematopoietic cells. **Blood** 113 (2009) 505-516.
  14. Wang, F., Yu, J., Yang, G.H., Wang, X.S. and Zhang, J.W. Regulation of erythroid differentiation by miR-376a and its targets. **Cell Res.** 21 (2011) 1196-1209.
  15. Pase, L., Layton, J.E., Kloosterman, W.P., Carradice, D., Waterhouse, P.M. and Lieschke, G.J. miR-451 regulates zebrafish erythroid maturation in vivo via its target gata2. **Blood** 113 (2009) 1794-1804.

16. Rasmussen, K.D., Simmini, S., Abreu-Goodger, C., Bartonicek, N., Di Giacomo, M., Bilbao-Cortes, D., Horos, R., Von Lindern, M., Enright, A.J. and O'Carroll, D. The miR-144/451 locus is required for erythroid homeostasis. **J. Exp. Med.** 207 (2010) 1351-1358.
17. Patrick, D.M., Zhang, C.C., Tao, Y., Yao, H., Qi, X., Schwartz, R.J., Jun-Shen Huang, L. and Olson, E.N. Defective erythroid differentiation in miR-451 mutant mice mediated by 14-3-3zeta. **Genes Dev.** 24 (2010) 1614-1619.
18. Fu, Y.F., Du, T.T., Dong, M., Zhu, K.Y., Jing, C.B., Zhang, Y., Wang, L., Fan, H.B., Chen, Y., Jin, Y., Yue, G.P., Chen, S.J., Chen, Z., Huang, Q.H., Jing, Q., Deng, M. and Liu, T.X. Mir-144 selectively regulates embryonic alpha-hemoglobin synthesis during primitive erythropoiesis. **Blood** 113 (2009) 1340-1349.
19. Sangokoya, C., Telen, M.J. and Chi, J.T. microRNA miR-144 modulates oxidative stress tolerance and associates with anemia severity in sickle cell disease. **Blood** 116 (2010) 4338-4348.
20. Lu, J., Guo, S., Ebert, B.L., Zhang, H., Peng, X., Bosco, J., Pretz, J., Schlanger, R., Wang, J.Y., Mak, R.H., Dombkowski, D.M., Preffer, F.I., Scadden, D.T. and Golub, T.R. MicroRNA-mediated control of cell fate in megakaryocyte-erythrocyte progenitors. **Dev. Cell** 14 (2008) 843-853.
21. Romania, P., Lulli, V., Pelosi, E., Biffoni, M., Peschle, C. and Marziali, G. MicroRNA 155 modulates megakaryopoiesis at progenitor and precursor level by targeting Ets-1 and Meis1 transcription factors. **Br. J. Haematol.** 143 (2008) 570-580.
22. Felli, N., Pedini, F., Romania, P., Biffoni, M., Morsilli, O., Castelli, G., Santoro, S., Chicarella, S., Sorrentino, A., Peschle, C. and Marziali, G. MicroRNA 223-dependent expression of LMO2 regulates normal erythropoiesis. **Haematologica** 94 (2009) 479-486.
23. Felli, N., Fontana, L., Pelosi, E., Botta, R., Bonci, D., Facchiano, F., Liuzzi, F., Lulli, V., Morsilli, O., Santoro, S., Valtieri, M., Calin, G.A., Liu, C.G., Sorrentino, A., Croce, C.M. and Peschle, C. MicroRNAs 221 and 222 inhibit normal erythropoiesis and erythroleukemic cell growth via kit receptor down-modulation. **Proc. Natl. Acad. Sci. USA** 102 (2005) 18081-18086.
